# Supplementary material
Source: PubMed Central journal article supplement (PMC6365162)
Supplement: NIHMS1006527-supplement-1.pdf [file NIHMS1006527-supplement-1.pdf]

## Supporting Information

### Two-Photon Polymerization of Topological Cues for Human iPSC Differentiation

Kristan S. Worthington,<sup>#</sup> Anh-Vu Do,<sup>#</sup> Rasheid Smith, Budd A. Tucker, and Aliasger K. Salem\*

<sup>#</sup>Joint first authors

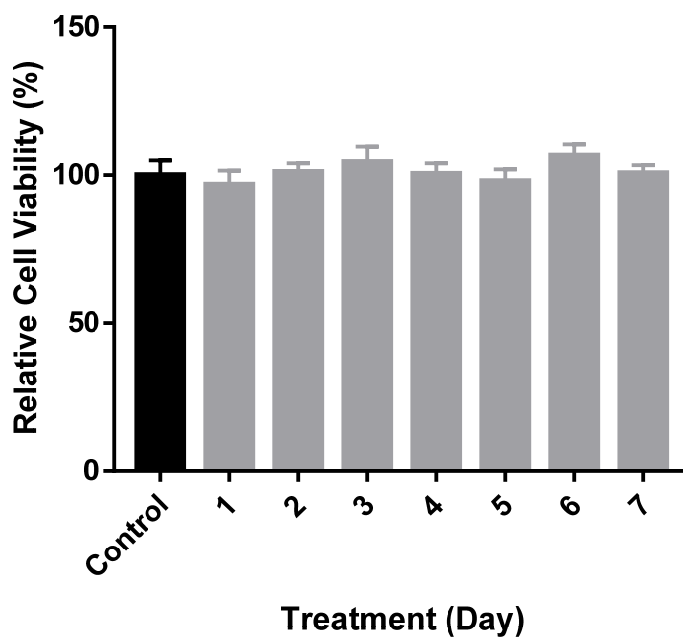

**Figure S1: Biocompatibility of polymerized photoresist.** Viability of iPSCs incubated with differentiation media that was conditioned by exposure to polymerized IP-L-780 (2PP photoresist) for up to seven days. Error bars represent standard deviation (n= 4).

**Table S1:** Number of replicates (n) with detectable signal for each target gene used to compare gene expression of stem cells grown on topographical features to a pluripotent population.

Targets shown in grey were excluded from analysis.

| <b>Target Name</b> | <b>Category</b> | <b>Control</b> | <b>1.6 <math>\mu</math>m</b> | <b>8 <math>\mu</math>m</b> |
|--------------------|-----------------|----------------|------------------------------|----------------------------|
| CXCL5              | Self-renewal    | 2              | 1                            | 1                          |
| DNMT3B             | Self-renewal    | 3              | 1                            | 3                          |
| HESX1              | Self-renewal    | 0              | 0                            | 0                          |
| IDO1               | Self-renewal    | 0              | 0                            | 0                          |
| LCK                | Self-renewal    | 0              | 0                            | 0                          |
| NANOG              | Self-renewal    | 2              | 1                            | 3                          |
| POU5F1             | Self-renewal    | 2              | 1                            | 2                          |
| SOX2               | Self-renewal    | 3              | 1                            | 3                          |
| TRIM22             | Self-renewal    | 2              | 1                            | 0                          |
| CDH9               | Ectoderm        | 0              | 0                            | 0                          |
| COL2A1             | Ectoderm        | 0              | 1                            | 0                          |
| DMBX1              | Ectoderm        | 0              | 0                            | 0                          |
| DRD4               | Ectoderm        | 1              | 0                            | 0                          |
| EN1                | Ectoderm        | 0              | 0                            | 0                          |
| LMX1A              | Ectoderm        | 0              | 0                            | 0                          |
| MAP2               | Ectoderm        | 3              | 1                            | 1                          |
| MYO3B              | Ectoderm        | 0              | 0                            | 0                          |
| NOS2               | Ectoderm        | 0              | 0                            | 0                          |
| NR2F1/NR2F2        | Ectoderm        | 1              | 0                            | 0                          |
| NR2F2              | Ectoderm        | 2              | 1                            | 1                          |
| OLFM3              | Ectoderm        | 0              | 0                            | 0                          |
| PAPLN              | Ectoderm        | 0              | 0                            | 0                          |
| PAX3               | Ectoderm        | 1              | 0                            | 0                          |
| PAX6               | Ectoderm        | 0              | 1                            | 0                          |
| POU4F1             | Ectoderm        | 0              | 0                            | 0                          |
| PRKCA              | Ectoderm        | 2              | 0                            | 0                          |
| SDC2               | Ectoderm        | 3              | 1                            | 2                          |
| SOX1               | Ectoderm        | 0              | 0                            | 0                          |
| TRPM8              | Ectoderm        | 0              | 0                            | 0                          |
| WNT1               | Ectoderm        | 0              | 0                            | 0                          |
| ZBTB16             | Ectoderm        | 1              | 0                            | 0                          |
| ABCA4              | Mesoderm        | 1              | 0                            | 0                          |
| ALOX15             | Mesoderm        | 0              | 0                            | 0                          |
| BMP10              | Mesoderm        | 0              | 0                            | 0                          |
| CDH5               | Mesoderm        | 1              | 0                            | 0                          |
| CDX2               | Mesoderm        | 0              | 0                            | 0                          |

|         |          |   |   |   |
|---------|----------|---|---|---|
| COLEC10 | Mesoderm | 1 | 1 | 1 |
| ESM1    | Mesoderm | 1 | 0 | 0 |
| FCN3    | Mesoderm | 0 | 0 | 0 |
| FOXF1   | Mesoderm | 3 | 1 | 0 |
| HAND1   | Mesoderm | 1 | 1 | 3 |
| HAND2   | Mesoderm | 0 | 0 | 0 |
| HEY1    | Mesoderm | 2 | 1 | 0 |
| HOPX    | Mesoderm | 1 | 0 | 0 |
| IL6ST   | Mesoderm | 3 | 1 | 1 |
| NKX2-5  | Mesoderm | 1 | 0 | 0 |
| ODAM    | Mesoderm | 0 | 0 | 0 |
| PDGFRA  | Mesoderm | 3 | 1 | 0 |
| PLVAP   | Mesoderm | 0 | 0 | 0 |
| RGS4    | Mesoderm | 2 | 1 | 0 |
| SNAI2   | Mesoderm | 2 | 1 | 0 |
| TBX3    | Mesoderm | 2 | 1 | 0 |
| <hr/>   |          |   |   |   |
| AFP     | Endoderm | 0 | 1 | 0 |
| CABP7   | Endoderm | 0 | 0 | 0 |
| CDH20   | Endoderm | 0 | 0 | 0 |
| CLDN1   | Endoderm | 3 | 1 | 2 |
| CPLX2   | Endoderm | 0 | 0 | 0 |
| ELAVL3  | Endoderm | 0 | 0 | 0 |
| EOMES   | Endoderm | 2 | 0 | 1 |
| FOXA1   | Endoderm | 1 | 1 | 0 |
| FOXA2   | Endoderm | 0 | 0 | 0 |
| FOXP2   | Endoderm | 1 | 0 | 0 |
| GATA4   | Endoderm | 0 | 0 | 0 |
| GATA6   | Endoderm | 2 | 1 | 1 |
| HHEX    | Endoderm | 0 | 1 | 0 |
| HMP19   | Endoderm | 0 | 0 | 0 |
| HNF1B   | Endoderm | 0 | 0 | 0 |
| HNF4A   | Endoderm | 0 | 0 | 0 |
| KLF5    | Endoderm | 2 | 1 | 1 |
| LEFTY1  | Endoderm | 0 | 0 | 0 |
| LEFTY2  | Endoderm | 0 | 0 | 1 |
| NODAL   | Endoderm | 1 | 0 | 0 |
| PHOX2B  | Endoderm | 0 | 0 | 0 |
| POU3F3  | Endoderm | 0 | 0 | 0 |
| PRDM1   | Endoderm | 2 | 1 | 0 |
| RXRG    | Endoderm | 0 | 0 | 0 |
| SOX17   | Endoderm | 0 | 0 | 0 |
| SST     | Endoderm | 0 | 0 | 0 |
| <hr/>   |          |   |   |   |

**Table S2:** Average threshold cycle (Ct, avg) and number of replicates (n) with detectable signal for each target gene used to compare gene expression of stem cells grown on topographical features to those grown on a feature-less glass control. Targets shown in grey were excluded from analysis.

| Target Name | Category     | Control |   | 1.6 $\mu$ m |   | 8 $\mu$ m |   |
|-------------|--------------|---------|---|-------------|---|-----------|---|
|             |              | Ct, avg | n | Ct, avg     | n | Ct, avg   | n |
| ACTB        | Controls     | 29.50   | 3 | 28.41       | 1 | 33.24     | 3 |
| ACTB        | Controls     | 32.72   | 3 | 33.03       | 1 | 37.04     | 3 |
| ACTB        | Controls     | 32.70   | 3 | 33.40       | 1 | 37.02     | 3 |
| ACTB        | Controls     | 29.86   | 3 | 28.58       | 1 | 33.59     | 3 |
| CTCF        | Controls     | 33.73   | 3 | 35.12       | 1 | 35.45     | 1 |
| EP300       | Controls     | 37.17   | 2 | 35.58       | 1 |           | 0 |
| SMAD1       | Controls     | 34.28   | 3 | 35.56       | 1 | 36.30     | 1 |
| CXCL5       | Self-renewal | 37.51   | 2 | 36.12       | 1 | 36.92     | 1 |
| DNMT3B      | Self-renewal | 35.65   | 3 | 34.29       | 1 | 36.54     | 3 |
| HESX1       | Self-renewal |         | 0 |             | 0 |           | 0 |
| IDO1        | Self-renewal |         | 0 |             | 0 |           | 0 |
| LCK         | Self-renewal |         | 0 |             | 0 |           | 0 |
| NANOG       | Self-renewal | 35.36   | 2 | 38.31       | 1 | 38.30     | 3 |
| POU5F1      | Self-renewal | 38.72   | 2 | 38.51       | 1 | 37.77     | 2 |
| SOX2        | Self-renewal | 35.51   | 3 | 34.20       | 1 | 37.09     | 3 |
| TRIM22      | Self-renewal | 35.96   | 2 | 37.59       | 1 |           | 0 |
| CDH9        | Ectoderm     |         | 0 |             | 0 |           | 0 |
| COL2A1      | Ectoderm     |         | 0 | 38.81       | 1 |           | 0 |
| DMBX1       | Ectoderm     |         | 0 |             | 0 |           | 0 |
| DRD4        | Ectoderm     | 38.81   | 1 |             | 0 |           | 0 |
| EN1         | Ectoderm     |         | 0 |             | 0 |           | 0 |
| LMX1A       | Ectoderm     |         | 0 |             | 0 |           | 0 |
| MAP2        | Ectoderm     | 36.45   | 3 | 37.20       | 1 | 38.60     | 1 |
| MYO3B       | Ectoderm     |         | 0 |             | 0 |           | 0 |
| NOS2        | Ectoderm     |         | 0 |             | 0 |           | 0 |
| NR2F1/NR2F2 | Ectoderm     | 38.02   | 1 |             | 0 |           | 0 |
| NR2F2       | Ectoderm     | 33.77   | 2 | 37.91       | 1 | 36.95     | 1 |
| OLFM3       | Ectoderm     |         | 0 |             | 0 |           | 0 |
| PAPLN       | Ectoderm     |         | 0 |             | 0 |           | 0 |
| PAX3        | Ectoderm     | 39.7    | 1 |             | 0 |           | 0 |
| PAX6        | Ectoderm     |         | 0 | 38.18       | 1 |           | 0 |
| POU4F1      | Ectoderm     |         | 0 |             | 0 |           | 0 |
| PRKCA       | Ectoderm     | 35.255  | 2 |             | 0 |           | 0 |

|         |          |        |   |       |   |        |   |
|---------|----------|--------|---|-------|---|--------|---|
| SDC2    | Ectoderm | 35.22  | 3 | 34.31 | 1 | 37.73  | 2 |
| SOX1    | Ectoderm |        | 0 |       | 0 |        | 0 |
| TRPM8   | Ectoderm |        | 0 |       | 0 |        | 0 |
| WNT1    | Ectoderm |        | 0 |       | 0 |        | 0 |
| ZBTB16  | Ectoderm | 38.10  | 1 |       | 0 |        | 0 |
| ABCA4   | Mesoderm | 38.10  | 1 |       | 0 |        | 0 |
| ALOX15  | Mesoderm |        | 0 |       | 0 |        | 0 |
| BMP10   | Mesoderm |        | 0 |       | 0 |        | 0 |
| CDH5    | Mesoderm | 37.58  | 1 |       | 0 |        | 0 |
| CDX2    | Mesoderm |        | 0 |       | 0 |        | 0 |
| COLEC10 | Mesoderm | 36.21  | 1 | 38.55 | 1 | 35.79  | 1 |
| ESM1    | Mesoderm | 37.29  | 1 |       | 0 |        | 0 |
| FCN3    | Mesoderm |        | 0 |       | 0 |        | 0 |
| FOXF1   | Mesoderm | 38.58  | 3 | 37.75 | 1 |        | 0 |
| HAND1   | Mesoderm | 35.81  | 1 | 35.95 | 1 | 38.86  | 3 |
| HAND2   | Mesoderm |        | 0 |       | 0 |        | 0 |
| HEY1    | Mesoderm | 37.49  | 2 | 34.18 | 1 |        | 0 |
| HOPX    | Mesoderm | 34.95  | 1 |       | 0 |        | 0 |
| IL6ST   | Mesoderm | 33.99  | 3 | 35.34 | 1 | 36.82  | 1 |
| NKX2-5  | Mesoderm | 36.98  | 1 |       | 0 |        | 0 |
| ODAM    | Mesoderm |        | 0 |       | 0 |        | 0 |
| PDGFRA  | Mesoderm | 37.25  | 3 | 37.80 | 1 |        | 0 |
| PLVAP   | Mesoderm |        | 0 |       | 0 |        | 0 |
| RGS4    | Mesoderm | 36.36  | 2 | 36.21 | 1 |        | 0 |
| SNAI2   | Mesoderm | 34.71  | 2 | 36.29 | 1 |        | 0 |
| TBX3    | Mesoderm | 37.65  | 2 | 35.57 | 1 |        | 0 |
| AFP     | Endoderm |        | 0 | 38.53 | 1 |        | 0 |
| CABP7   | Endoderm |        | 0 |       | 0 |        | 0 |
| CDH20   | Endoderm |        | 0 |       | 0 |        | 0 |
| CLDN1   | Endoderm | 36.21  | 3 | 37.22 | 1 | 38.585 | 2 |
| CPLX2   | Endoderm |        | 0 |       | 0 |        | 0 |
| ELAVL3  | Endoderm |        | 0 |       | 0 |        | 0 |
| EOMES   | Endoderm | 36.44  | 2 |       | 0 | 38.04  | 1 |
| FOXA1   | Endoderm | 36.89  | 1 | 37.53 | 1 |        | 0 |
| FOXA2   | Endoderm |        | 0 |       | 0 |        | 0 |
| FOXP2   | Endoderm | 39.19  | 1 |       | 0 |        | 0 |
| GATA4   | Endoderm |        | 0 |       | 0 |        | 0 |
| GATA6   | Endoderm | 36.095 | 2 | 35.29 | 1 | 39.49  | 1 |
| HHEX    | Endoderm |        | 0 | 37.83 | 1 |        | 0 |
| HMP19   | Endoderm |        | 0 |       | 0 |        | 0 |
| HNF1B   | Endoderm |        | 0 |       | 0 |        | 0 |
| HNF4A   | Endoderm |        | 0 |       | 0 |        | 0 |
| KLF5    | Endoderm | 36.185 | 2 | 35.5  | 1 | 39.26  | 1 |
| LEFTY1  | Endoderm |        | 0 |       | 0 |        | 0 |

|              |                 |              |          |              |          |       |          |
|--------------|-----------------|--------------|----------|--------------|----------|-------|----------|
| LEFTY2       | Endoderm        |              | 0        |              | 0        | 38.23 | 1        |
| NODAL        | Endoderm        | 36.9         | 1        |              | 0        |       | 0        |
| PHOX2B       | Endoderm        |              | 0        |              | 0        |       | 0        |
| POU3F3       | Endoderm        |              | 0        |              | 0        |       | 0        |
| <b>PRDM1</b> | <b>Endoderm</b> | <b>36.69</b> | <b>2</b> | <b>34.76</b> | <b>1</b> |       | <b>0</b> |
| RXRG         | Endoderm        |              | 0        |              | 0        |       | 0        |
| SOX17        | Endoderm        |              | 0        |              | 0        |       | 0        |
| SST          | Endoderm        |              | 0        |              | 0        |       | 0        |

---
